# Supplementary material for: Metabolic profiling of murine radiation-induced lung injury with Raman spectroscopy and comparative machine learning
Source: Royal Society of Chemistry journal article supplement (doi:10.1039/d4an00152d), 2024-01-01
Supplement: d4an00152d1.pdf [file d4an00152d1.pdf]

# Supplementary Info – Metabolic Profiling of Murine Radiation-Induced Lung Injury with Raman Spectroscopy and Comparative Machine Learning

**Mitchell Wiebe<sup>1</sup>, Kirsty Milligan<sup>1</sup>, Joan Brewer<sup>1</sup>, Alejandra M. Fuentes<sup>1</sup>, Ramie Ali-Adeeb<sup>2</sup>, Alexandre Brolo<sup>2</sup>, Julian J. Lum<sup>3,4</sup>, Jeffrey L. Andrews<sup>1</sup>, Christina Haston<sup>1,\*</sup>, and Andrew Jirasek<sup>1,\*</sup>**

<sup>1</sup>Department of Computer Science, Mathematics, Physics, and Statistics, The University of British Columbia Okanagan Campus, Kelowna, Canada

<sup>2</sup>Department of Chemistry, The University of Victoria, Victoria, Canada

<sup>3</sup>Department of Biochemistry and Microbiology, University of Victoria, Victoria, Canada

<sup>4</sup>Trev and Joyce Deeley Research Centre, BC Cancer, Victoria, Canada

\*Corresponding authors: christina.haston@ubc.ca, andrew.jirasek@ubc.ca

**Table S1.** Mouse identifiers and post-radiation date survival times.

| <b>Strain</b> | <b>Mouse Label</b> | <b>Dose</b> | <b>Time from radiation date to euthanasia (days)</b> |
|---------------|--------------------|-------------|------------------------------------------------------|
| C3H/HeJ       | Irr 1              | 16 Gy       | 88                                                   |
| C3H/HeJ       | Irr 2              | 16 Gy       | 86                                                   |
| C3H/HeJ       | Irr 3              | 16 Gy       | 86                                                   |
| C3H/HeJ       | Irr 4              | 16 Gy       | 88                                                   |
| C3H/HeJ       | Irr 5              | 16 Gy       | 86                                                   |
| C3H/HeJ       | Ctrl 1             | 0 Gy        | 86                                                   |
| C3H/HeJ       | Ctrl 2             | 0 Gy        | 86                                                   |
| C3H/HeJ       | Ctrl 3             | 0 Gy        | 86                                                   |
| C3H/HeJ       | Ctrl 4             | 0 Gy        | 91                                                   |
| C3H/HeJ       | Ctrl 5             | 0 Gy        | 91                                                   |
| C57BL/6       | Irr 1              | 16 Gy       | 157                                                  |
| C57BL/6       | Irr 2              | 16 Gy       | 162                                                  |
| C57BL/6       | Irr 3              | 16 Gy       | 147                                                  |
| C57BL/6       | Irr 4              | 16 Gy       | 163                                                  |
| C57BL/6       | Irr 5              | 16 Gy       | 144                                                  |
| C57BL/6       | Ctrl 1             | 0 Gy        | 157                                                  |
| C57BL/6       | Ctrl 2             | 0 Gy        | 157                                                  |
| C57BL/6       | Ctrl 3             | 0 Gy        | 157                                                  |
| C57BL/6       | Ctrl 4             | 0 Gy        | 164                                                  |
| C57BL/6       | Ctrl 5             | 0 Gy        | 164                                                  |

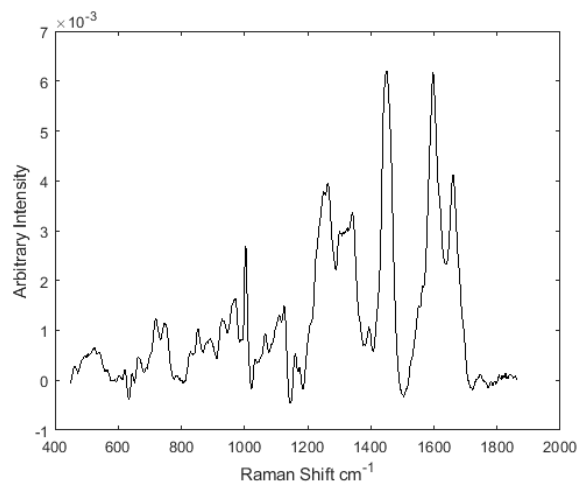

(a)

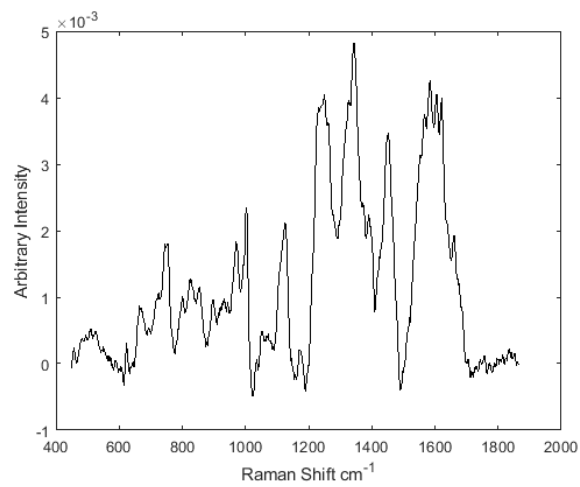

(b)

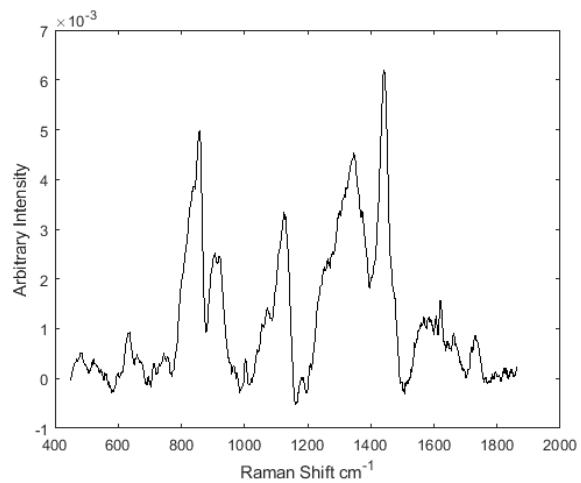

(c)

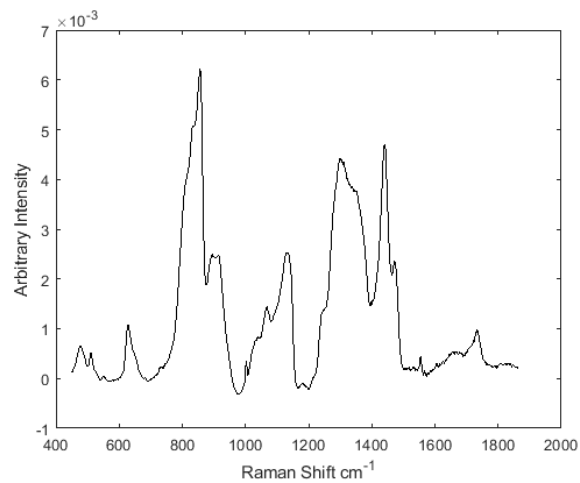

(d)

**Figure S1.** Examples of variable Raman spectral quality obtained from a C57 mouse lung: (a) high-quality preserved spectrum, (b) low-quality removed spectrum, (c) spectrum removed due to high correlation with OCT-PBS, and (d) a spectrum of pure OCT-PBS for comparison.

**Table S2.** Raman library for GBR-NMF (group and basis restricted non-negative matrix factorization).

| <b>Name</b>          | <b>Group</b>       |
|----------------------|--------------------|
| Alanine              | Amino acid         |
| Arginine             | Amino acid         |
| Asparagine           | Amino acid         |
| Aspartic Acid        | Amino acid         |
| Cholesterol          | Lipid              |
| Citric Acid          | TCA cycle          |
| Coenzyme A           | TCA cycle          |
| Collagen             | Protein            |
| Cysteine             | Amino acid         |
| DNA                  | Nucleic acid       |
| Glucose              | Carbohydrate       |
| Glutamic Acid        | Amino acid         |
| Glutathione          | Antioxidant        |
| Glycerol             | Sugar alcohol      |
| Glycogen             | Carbohydrate       |
| Histidine            | Amino acid         |
| Isoleucine           | Amino acid         |
| Lactose              | Carbohydrate       |
| Leucine              | Amino acid         |
| L-Glutamic Acid      | Amino acid         |
| Lysine               | Amino acid         |
| Mannose              | Carbohydrate       |
| Methionine           | Amino acid         |
| OCT-PBS              | Stabilizing medium |
| Oleic Acid           | Fatty acid         |
| Palmitic Acid        | Fatty acid         |
| Phenylalanine        | Amino acid         |
| Phosphatidylcholine  | Phospholipid       |
| Phosphatidylserine   | Phospholipid       |
| Phosphatidylinositol | Phospholipid       |
| Serine               | Amino acid         |
| Stearic Acid         | Fatty acid         |
| Threonine            | Amino acid         |
| Triglycerides        | Lipid              |
| Tryptophan           | Amino acid         |
| Tyrosine             | Amino acid         |
| Valine               | Amino acid         |

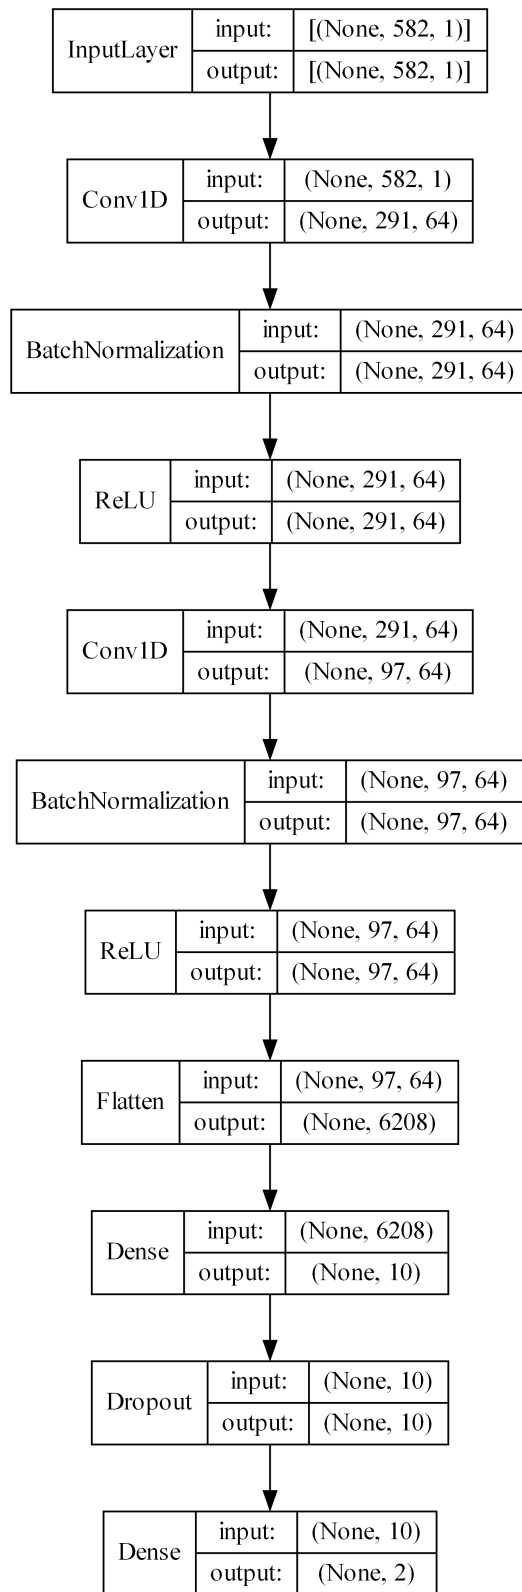

**Figure S2.** CNN architecture.

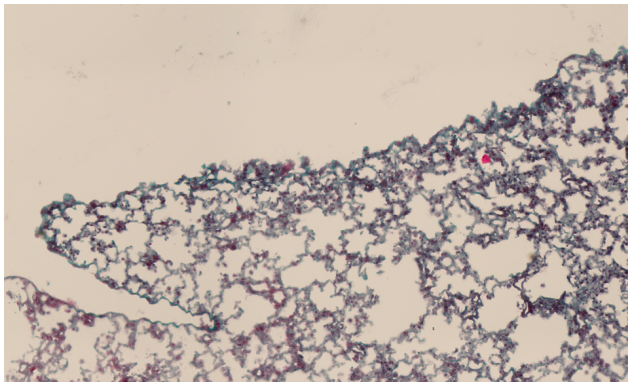

(a)

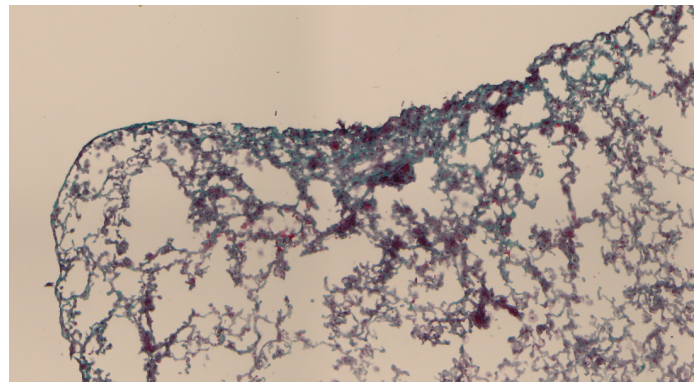

(b)

**Figure S3.** (a) Collagen presence within a C3H/HeJ mouse lung post-radiation. (b) Collagen presence and alveolar collapse within a C57/BL6J mouse lung post-radiation. Collagen is indicated by cyan regions.
